# Supplementary material
Source: PubMed Central journal article supplement (PMC7061308)

# Figure S1

A

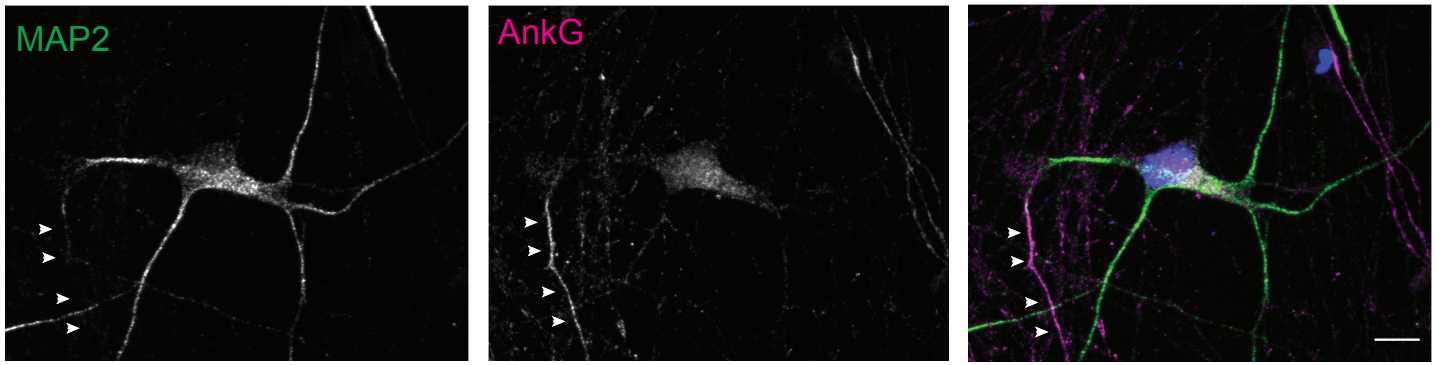

B

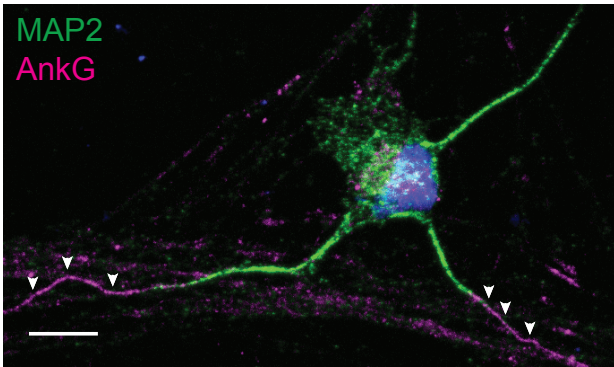

C

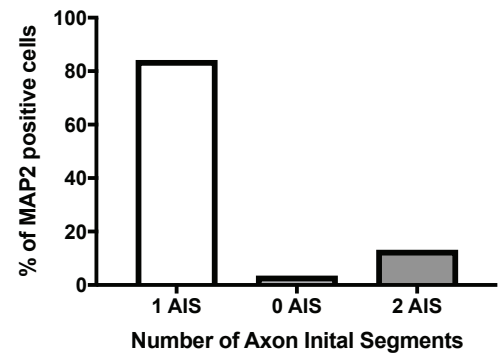

Figure S2

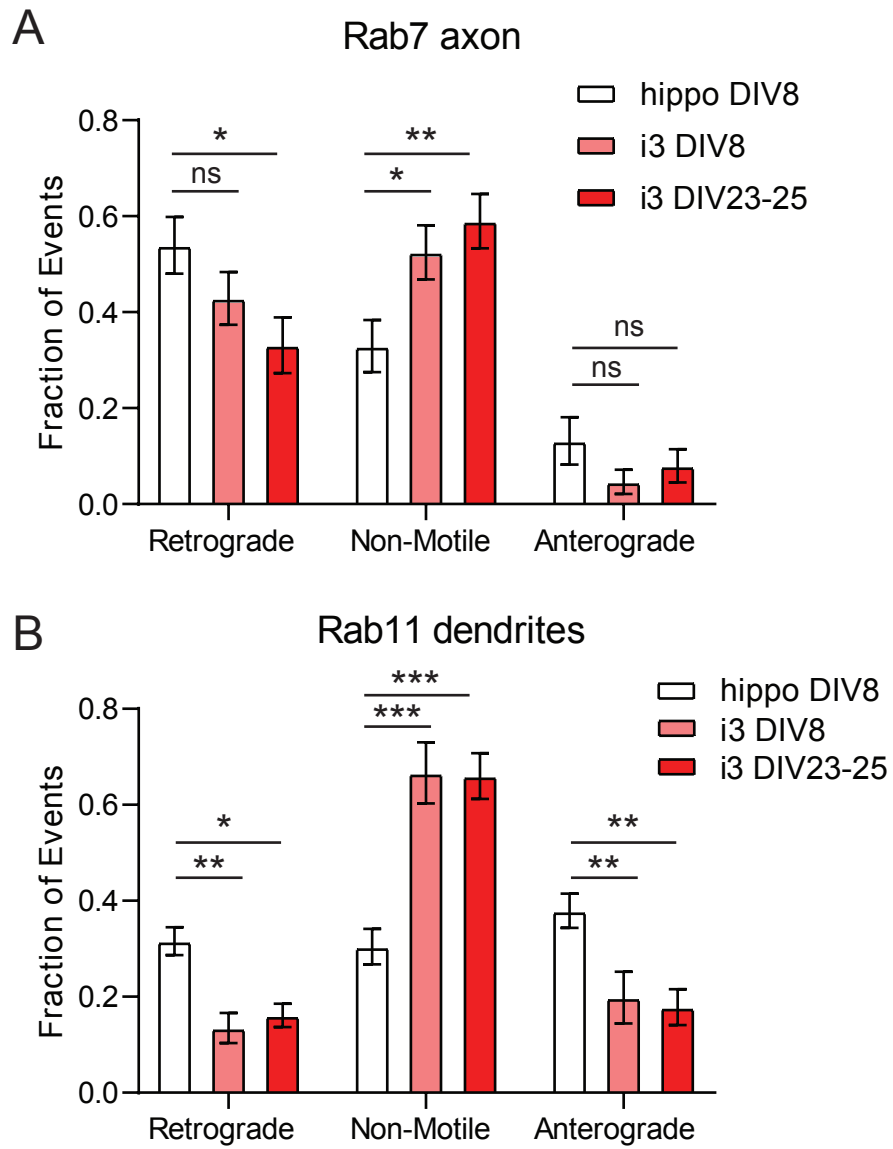

Supplement: NIHMS1069433-supplement-1.pdf [file NIHMS1069433-supplement-1.pdf]
